# Supplementary material
Source: PubMed Central journal article supplement (PMC2504901)
Supplement: C800120200_1.pdf [file C800120200_1.pdf]

## Supplemental Data

### **Crystal structure of the lysine riboswitch regulatory mRNA element**

Andrew D. Garst,<sup>1</sup> Annie Héroux,<sup>2</sup> Robert P. Rambo,<sup>3</sup> and Robert T. Batey<sup>1,\*</sup>

<sup>1</sup>Department of Chemistry and Biochemistry, 215 UCB, University of Colorado, Boulder, Boulder, CO 80309, USA. <sup>2</sup>Biology Department, Brookhaven National Laboratory, Upton, NY 11973, USA. <sup>3</sup>Life Science Division, Lawrence Berkeley National Laboratory, Berkeley, CA 94720, USA

Telephone: (303) 735-2159

FAX: (303) 492-5894

e-mail: [robert.batey@colorado.edu](mailto:robert.batey@colorado.edu)

**Supplemental Table 1: Data collection, phasing and refinement statistics**

|                                            | Lysine-RNA complex<br>Ir-hexammine derivative | Free RNA               |
|--------------------------------------------|-----------------------------------------------|------------------------|
| <b>Data collection</b>                     |                                               |                        |
| Space group                                | P3 <sub>2</sub>                               | P3 <sub>2</sub>        |
| Cell dimensions                            |                                               |                        |
| a, b, c (Å)                                | 119.82, 119.82, 58.74                         | 120.19, 120.19, 58.25  |
| $\alpha$ , $\beta$ , $\gamma$ (°)          | 90, 90, 120                                   | 90, 90, 120            |
| Wavelength (Å)                             | 1.1050                                        | 1.5418                 |
| Resolution (Å)                             | 40.0–2.8 (2.91 - 2.8)*                        | 19.70–2.95 (3.06-2.95) |
| $R_{\text{sym}}$ or $R_{\text{merge}}$ (%) | 8.4 (34.8)                                    | 9.0 (35.5)             |
| $I/\sigma$                                 | 17.9 (4.4)                                    | 10.2 (3.4)             |
| Completeness (%)                           | 99.5 (96.6)                                   | 99.5 (100)             |
| Redundancy                                 | 5.2 (3.7)                                     | 3.62 (3.63)            |
| <b>Refinement</b>                          |                                               |                        |
| Resolution (Å)                             | 32.6–2.8 (2.87-2.8)                           | 17.11-2.95 (3.02-2.95) |
| No. reflections                            | 23986 (97.7%)                                 | 19610 (99.4%)          |
| $R_{\text{work}}/ R_{\text{free}}$         | 18.20/20.86                                   | 18.61/22.04            |
| No. atoms                                  | 3631                                          | 3547                   |
| RNA                                        | 3491                                          | 3491                   |
| Ligand                                     | 10                                            | N/A                    |
| Water                                      | 55                                            | 56                     |
| Atomic Displacement                        | 54.61                                         | 54.92                  |
| Parameters (B-factors), all                |                                               |                        |
| RNA                                        | 47.22                                         | 55.12                  |
| Ligand/ion                                 | 35.76                                         | N/A                    |
| Water                                      | 39.14                                         | 42.87                  |
| r.m.s. deviations                          |                                               |                        |
| Bond lengths (Å)                           | 0.005                                         | 0.004                  |
| Bond angles (°)                            | 1.251                                         | 1.239                  |
| Maximum likelihood coordinate error (Å)    | 0.32                                          | 0.43                   |

Data was collected from a single crystal.

\*Highest resolution shell is shown in parenthesis.

**Supplemental Table 2: SAXS Parameters**

|                        | Unfolded   | Native     | Native-Bound |
|------------------------|------------|------------|--------------|
| <b>parameters</b>      |            |            |              |
| Guinier $R_g$ , Å      | 41.8(±0.5) | 29.7(±0.3) | 31.1(±0.4)   |
| Real space $R_g$ , Å   | 47.3(±0.2) | 32.0(±0.1) | 31.5(±0.1)   |
| $D_{\max}$ estimate, Å | 172        | 108        | 108          |

Guinier  $R_g$  refers to radius of gyration determinations within the linear range of the scattering data when plotted as  $\ln[I(q)]$  vs  $q^2$ . Real Space  $R_g$  refers to radius of gyration determinations based on the integration of the pair distribution function for each data set.

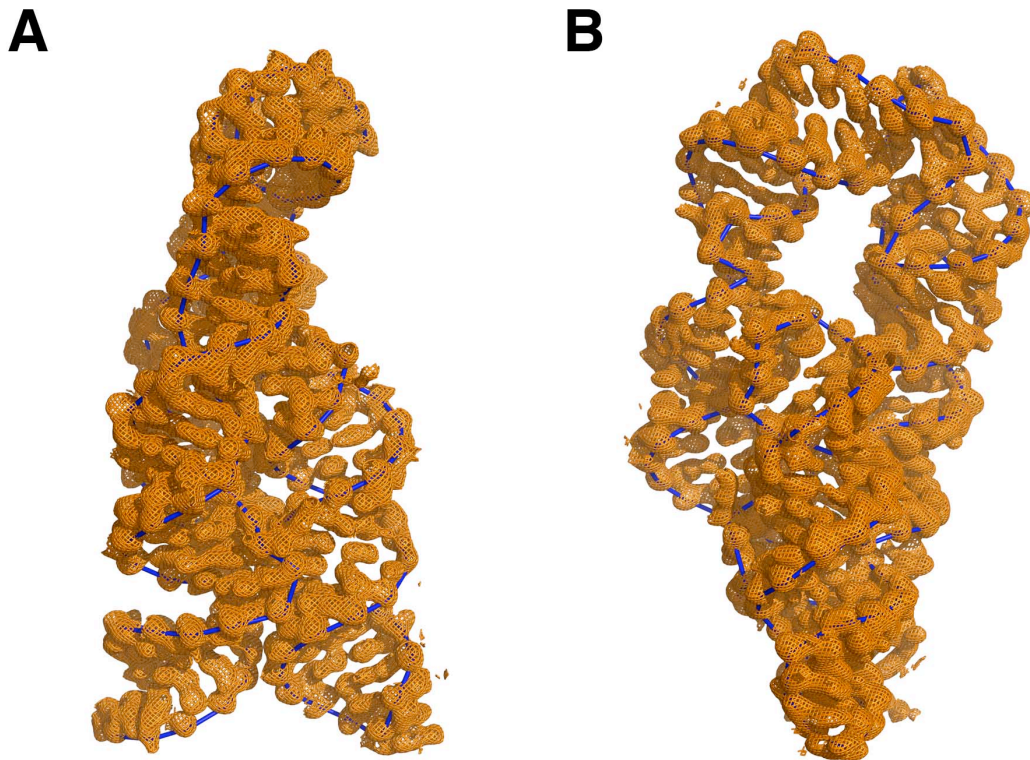

**Figure S1. Experimental electron density map.** The experimental electron density map (orange mesh) for a single asymmetric unit, unbiased by model phases and contoured at  $1.0\sigma$ . The final model (blue ribbon) is overlaid on the map to provide perspective. (A) and (B) correspond to the same views depicted in Figure 1C.

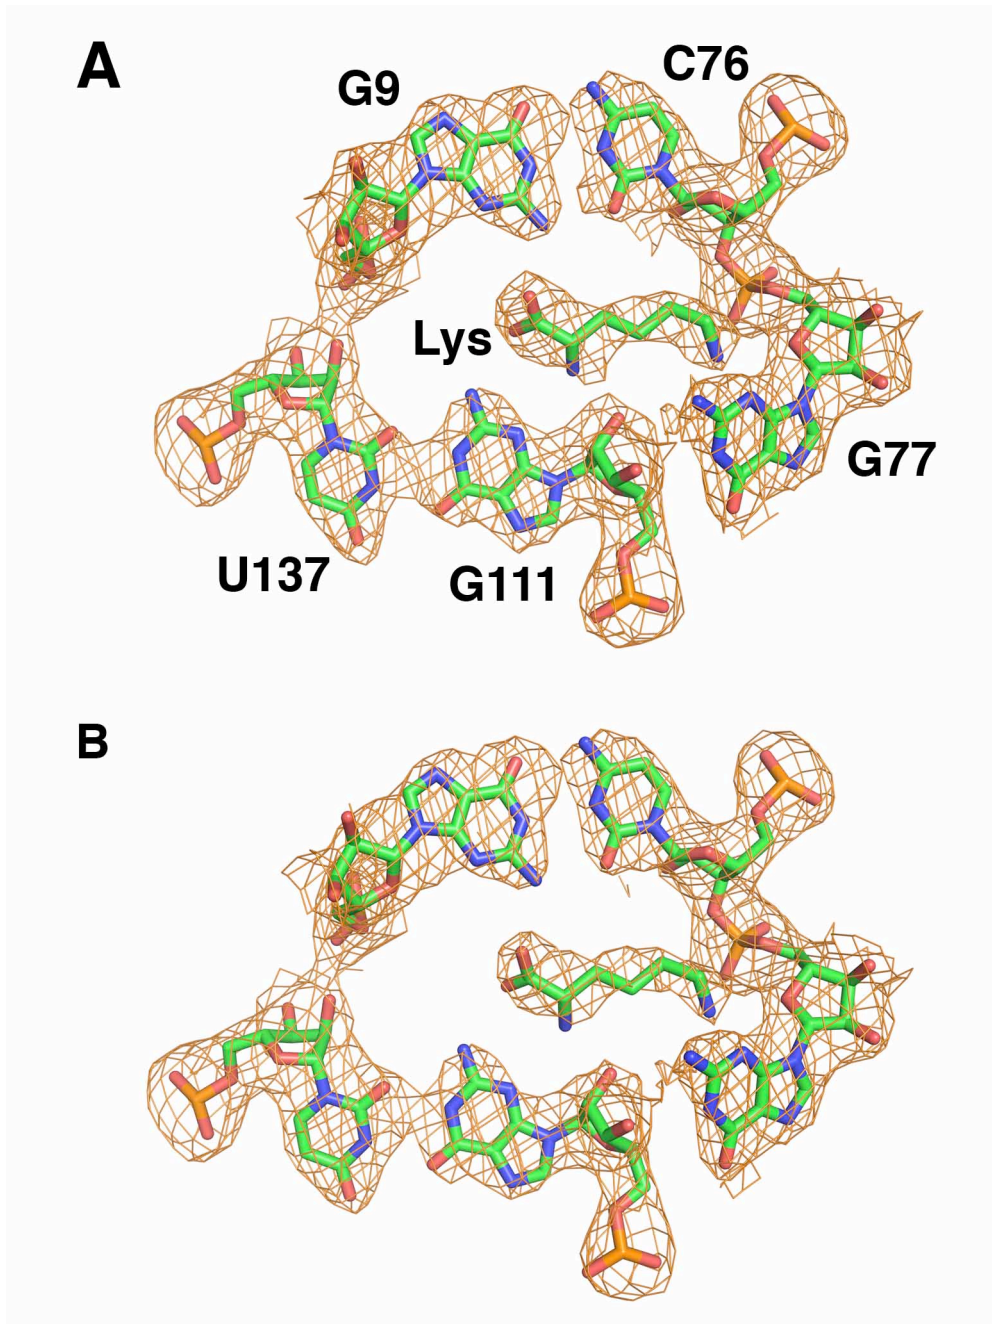

**Figure S2. Maps of the ligand binding pocket.** (A) Final 2Fo-Fc map contoured at  $1.0\sigma$  around the nucleotide residues that define the binding pocket and lysine. (B) Simulated annealing omit map in which residues 76, 77, 111 were omitted along with lysine. Note that the density around the ligand remains defined for the entire amino acid and its positioning within the pocket is unambiguous.

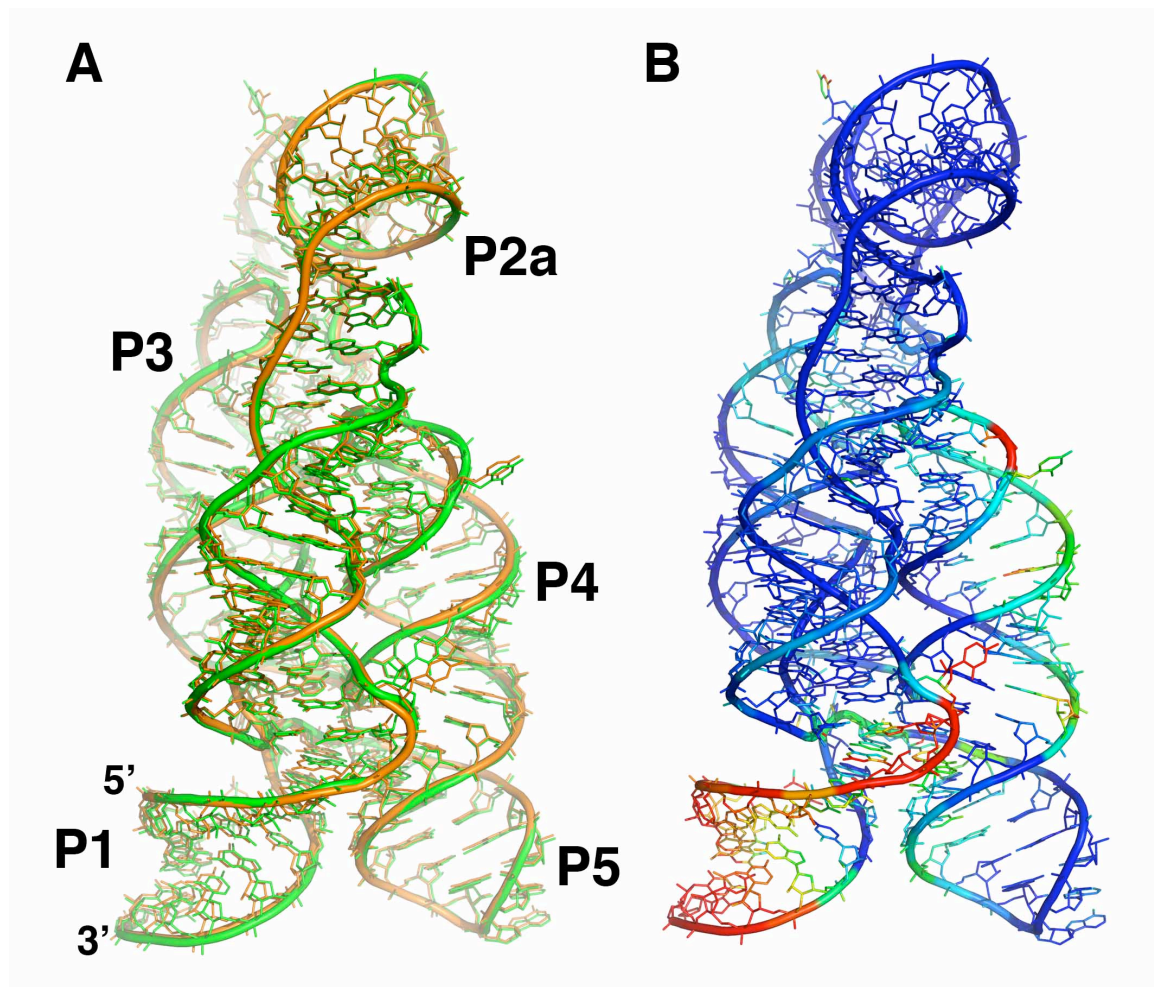

**Figure S3. Superposition of free and bound lysine riboswitch. (A)** Superpositioning of the free (orange) and bound (green) structures of the lysine riboswitch using the Theseus alignment program. The two structures superposition with a maximum likelihood r.m.s.d. of  $0.08 \text{ \AA}$  (classical pairwise r.m.s.d. is  $0.70 \text{ \AA}$ ). **(B)** Map of the estimated variance between the two structures in atomic coordinates between the two structures; blue represents low variance ( $<1 \text{ \AA}^2$ ) and red denotes high variance ( $>10 \text{ \AA}^2$ ).

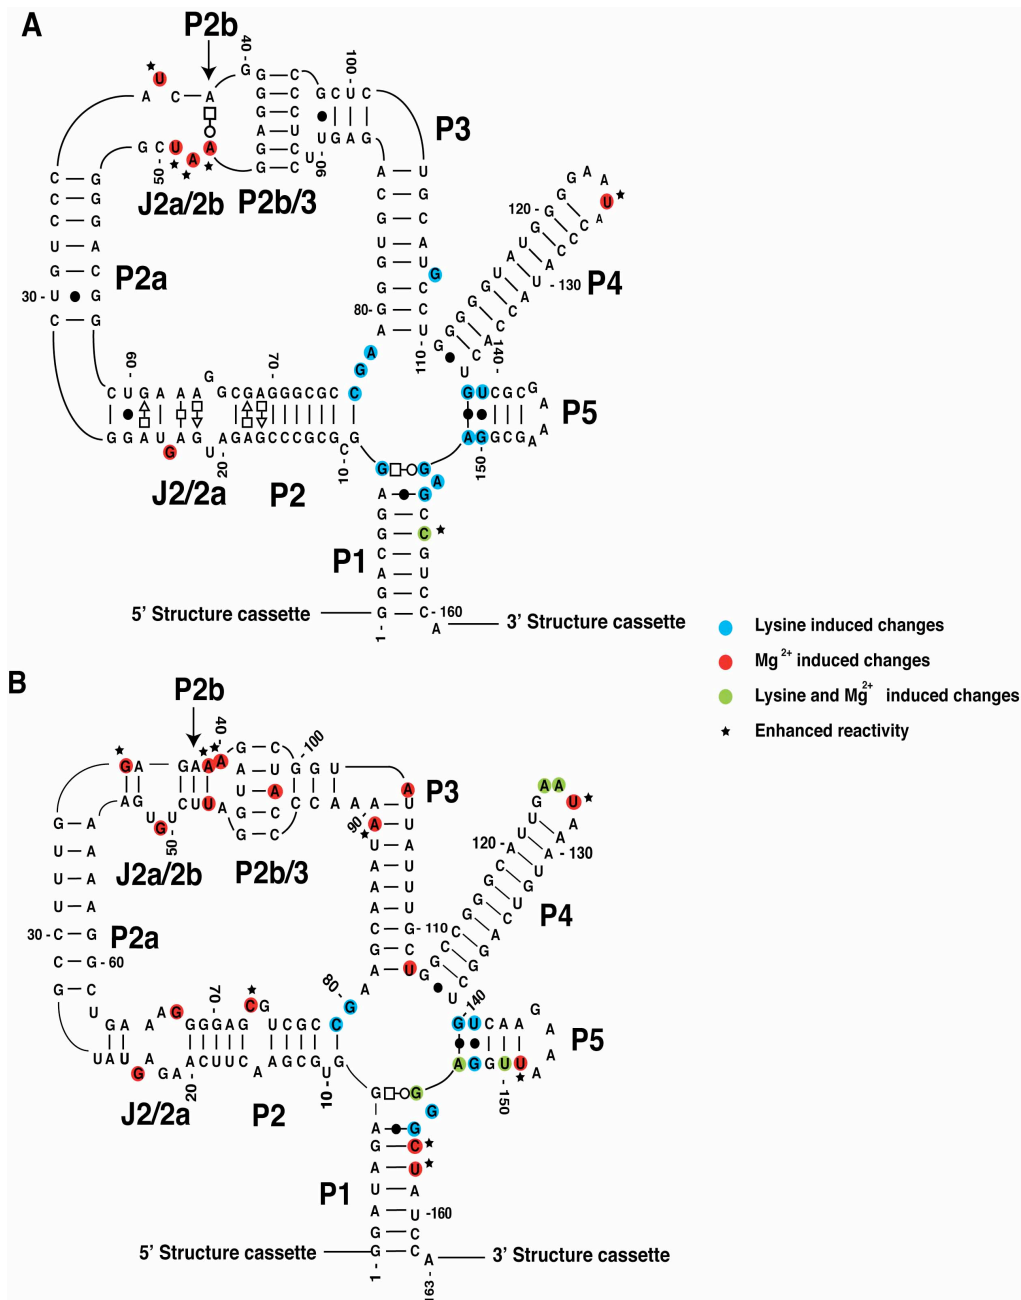

**Figure S4. Sequence and structure of RNAs used in SHAPE experiments.** The labeling of paired regions has been retained from Fig. 1B; non-canonical base pairing interactions shown in the secondary structure of the *B. subtilis* variant are inferred from the crystal structure of the *T. maritima* variant. (A) The *T. maritima* construct used in the crystallographic studies is shown with the structure cassettes on either end. (B) The riboswitch upstream of the *lysC* gene in *B. subtilis*. Note that the P5 region has been truncated to the same length as the *T. maritima* construct for consistency. The 5' and 3' structure cassettes are illustrated in the literature (19). Annotation of reactivity patterns from chemical probing (Figure S5) is denoted on each, per the legend to the right.

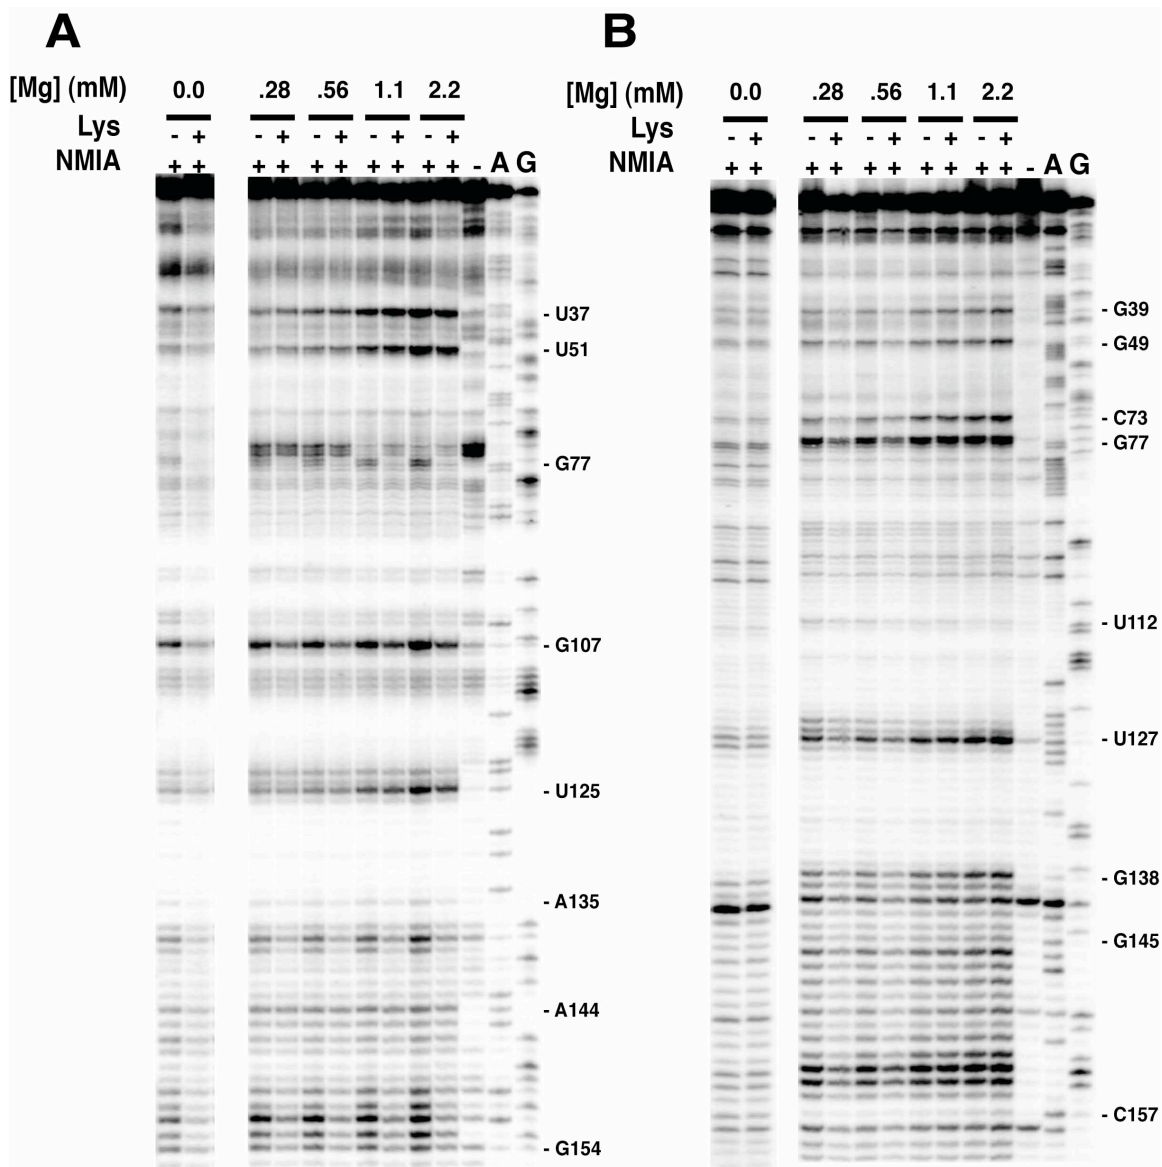

**Figure S5. SHAPE probing of the *T. maritima asd* (left) and *B. subtilis lysC* (right) lysine riboswitches.** The overall pattern of chemical reactivity demonstrates the overall similarity in the global structure of two lysine riboswitch variants in their response to both magnesium and lysine.



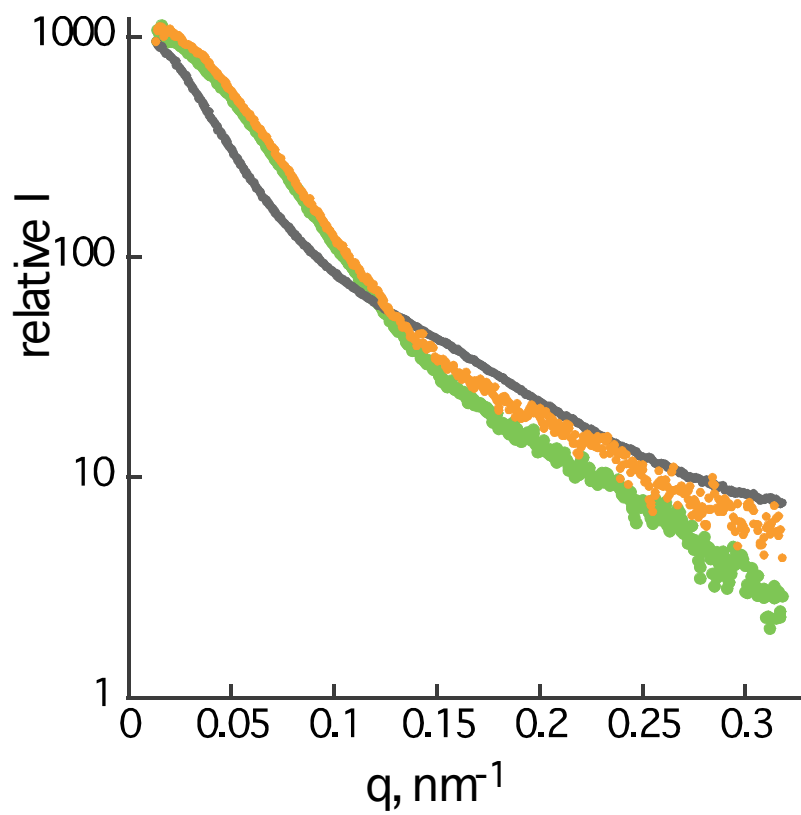

**Figure S6. Experimental SAXS curves.** Data corresponding to free (EDTA, grey; magnesium, orange) and lysine-bound (green) riboswitch RNA plotted on a relative intensity scale.
